# Supplementary material for: Effects of Pre-Pregnancy Overweight/Obesity on the Pattern of Association of Hypertension Susceptibility Genes with Preeclampsia
Source: MDPI journal article supplement (doi:10.3390/life12122018), 2022-12-03
Supplement: s1 [file s1]

Supplementary table S3

The allele and genotype frequencies of the studied SNPs in the preeclampsia and control groups with preBMI&lt;25

| Chr                           | SNP       | Gene              | Minor allele | Major allele | Minor allele frequency | Number of the studied chromosomes | Genotype distribution* | H <sub>o</sub> | H <sub>e</sub> | P <sub>HWE</sub> |
|-------------------------------|-----------|-------------------|--------------|--------------|------------------------|-----------------------------------|------------------------|----------------|----------------|------------------|
| Preeclampsia patients (n=290) |           |                   |              |              |                        |                                   |                        |                |                |                  |
| 5                             | rs1173771 | <i>AC026703.1</i> | A            | G            | 0.413                  | 566                               | 46/142/95              | 0.502          | 0.485          | 0.624            |
| 6                             | rs1799945 | <i>HFE</i>        | G            | C            | 0.201                  | 572                               | 12/91/183              | 0.318          | 0.321          | 0.854            |
| 6                             | rs805303  | <i>BAG6</i>       | A            | G            | 0.365                  | 580                               | 35/142/113             | 0.489          | 0.464          | 0.377            |
| 10                            | rs932764  | <i>PLCE1</i>      | A            | G            | 0.476                  | 578                               | 65/145/79              | 0.502          | 0.499          | 1.000            |
| 10                            | rs4387287 | <i>OBFC1</i>      | A            | C            | 0.183                  | 542                               | 9/81/181               | 0.299          | 0.299          | 1.000            |
| 11                            | rs633185  | <i>ARHGAP42</i>   | G            | C            | 0.292                  | 568                               | 17/132/135             | 0.465          | 0.414          | 0.045            |
| 12                            | rs7302981 | <i>CERS5</i>      | A            | G            | 0.389                  | 578                               | 43/139/107             | 0.481          | 0.475          | 0.908            |
| 12                            | rs2681472 | <i>ATP2B1</i>     | G            | A            | 0.150                  | 578                               | 7/73/209               | 0.253          | 0.256          | 0.818            |
| 17                            | rs8068318 | <i>TBX2</i>       | C            | T            | 0.299                  | 562                               | 29/110/142             | 0.391          | 0.419          | 0.258            |
| 19                            | rs167479  | <i>RGL3</i>       | G            | T            | 0.460                  | 572                               | 62/139/85              | 0.486          | 0.497          | 0.722            |
| Control group (n=339)         |           |                   |              |              |                        |                                   |                        |                |                |                  |
| 5                             | rs1173771 | <i>AC026703.1</i> | A            | G            | 0.459                  | 652                               | 65/169/92              | 0.518          | 0.497          | 0.503            |
| 6                             | rs1799945 | <i>HFE</i>        | G            | C            | 0.206                  | 676                               | 8/123/207              | 0.364          | 0.327          | 0.045            |
| 6                             | rs805303  | <i>BAG6</i>       | A            | G            | 0.401                  | 676                               | 50/171/117             | 0.506          | 0.480          | 0.366            |
| 10                            | rs932764  | <i>PLCE1</i>      | A            | G            | 0.488                  | 658                               | 85/151/93              | 0.459          | 0.499          | 0.151            |
| 10                            | rs4387287 | <i>OBFC1</i>      | A            | C            | 0.199                  | 632                               | 11/104/201             | 0.329          | 0.319          | 0.724            |
| 11                            | rs633185  | <i>ARHGAP42</i>   | G            | C            | 0.289                  | 672                               | 23/148/165             | 0.440          | 0.411          | 0.231            |
| 12                            | rs7302981 | <i>CERS5</i>      | A            | G            | 0.376                  | 664                               | 40/170/122             | 0.512          | 0.469          | 0.128            |
| 12                            | rs2681472 | <i>ATP2B1</i>     | G            | A            | 0.132                  | 672                               | 4/81/251               | 0.241          | 0.229          | 0.480            |
| 17                            | rs8068318 | <i>TBX2</i>       | C            | T            | 0.265                  | 644                               | 20/131/171             | 0.407          | 0.390          | 0.479            |
| 19                            | rs167479  | <i>RGL3</i>       | G            | T            | 0.520                  | 660                               | 89/165/76              | 0.500          | 0.499          | 1.000            |

Note: \* minor allele homozygotes / heterozygotes / major allele homozygotes
