# Supplementary material for: Effects of Pre-Pregnancy Overweight/Obesity on the Pattern of Association of Hypertension Susceptibility Genes with Preeclampsia
Source: MDPI journal article supplement (doi:10.3390/life12122018), 2022-12-03
Supplement: s1 [file s1]

Supplementary table S1

The GWAS data about associations of the studied candidate genes polymorphisms with blood pressure/hypertension, some cardiovascular diseases and anthropometric characteristics

| SNP of gene<br>(position (hg38))                | Phenotype                                        | Association (significance)<br>(affected allele)    | Reference                             |
|-------------------------------------------------|--------------------------------------------------|----------------------------------------------------|---------------------------------------|
| rs1173771<br><i>AC026703.1</i><br>(5: 32814922) | SBP                                              | $\beta = 0.50$ ( $p = 1.8 \times 10^{-16}$ ) (G)   | International Consortium et al., 2011 |
|                                                 | DBP                                              | $\beta = 0.26$ ( $p = 9.1 \times 10^{-12}$ ) (G)   |                                       |
|                                                 | Hypertension                                     | $\beta = 0.06$ ( $p = 3.2 \times 10^{-10}$ ) (G)   |                                       |
|                                                 | MAP                                              | $\beta = 0.28$ ( $p = 3.51 \times 10^{-9}$ ) (G)   | Wain L. V., et al., 2011              |
|                                                 | PP                                               | $\beta = 0.28$ ( $p = 4.56 \times 10^{-9}$ ) (G)   |                                       |
|                                                 | MAP                                              | $\beta = -0.35$ ( $p = 3.19 \times 10^{-8}$ ) (A)  | Kato N., et al., 2015                 |
|                                                 | Hip circumference (sex-combined)                 | $\beta = 0.03$ ( $p = 6.13 \times 10^{-13}$ ) (A)  | Shungin D., et al., 2015              |
|                                                 | Hip circumference (men)                          | $\beta = 0.03$ ( $p = 6.19 \times 10^{-8}$ ) (A)   |                                       |
|                                                 | SBP                                              | $\beta = -0.43$ ( $p = 2.0 \times 10^{-28}$ ) (A)  | Hoffmann T. J. et al., 2017           |
|                                                 | PP                                               | $\beta = -0.25$ ( $p = 1.0 \times 10^{-21}$ ) (A)  |                                       |
|                                                 | DBP                                              | $\beta = -0.19$ ( $p = 8.0 \times 10^{-16}$ ) (A)  |                                       |
|                                                 | Height                                           | $\beta = 0.04$ ( $p = 9.0 \times 10^{-8}$ ) (A)    | Tachmazidou I., et al., 2017          |
|                                                 | SBP                                              | $\beta = 0.51$ ( $p = 3.20 \times 10^{-12}$ ) (G)  | Wain L. V., et al., 2017              |
|                                                 | PP                                               | $\beta = 0.28$ ( $p = 2.36 \times 10^{-9}$ ) (G)   |                                       |
|                                                 | SBP (smoking interaction) (European)             | $p = 1.74 \times 10^{-38}$                         | Sung Y. J., et al., 2018              |
|                                                 | DBP (smoking interaction) (European)             | $p = 3.62 \times 10^{-22}$                         |                                       |
|                                                 | SBP (smoking interaction)<br>(trans-ethnic data) | $p = 8.25 \times 10^{-44}$                         |                                       |
|                                                 | DBP (smoking interaction)<br>(trans-ethnic data) | $p = 2.75 \times 10^{-28}$                         |                                       |
|                                                 | SBP                                              | $\beta = -0.42$ ( $p = 4.19 \times 10^{-8}$ ) (A)  | Takeuchi F., et al., 2018             |
|                                                 | MAP                                              | $\beta = -0.29$ ( $p = 5.39 \times 10^{-8}$ ) (A)  |                                       |
| rs1799945<br><i>HFE</i><br>(6: 26090951)        | DBP                                              | $\beta = 0.46$ ( $p = 1.5 \times 10^{-15}$ ) (G)   | International Consortium et al., 2011 |
|                                                 | SBP                                              | $\beta = 0.62$ ( $p = 7.7 \times 10^{-12}$ ) (G)   |                                       |
|                                                 | Hypertension                                     | $\beta = 0.10$ ( $p = 1.8 \times 10^{-10}$ ) (G)   |                                       |
|                                                 | DBP                                              | $\beta = -0.43$ ( $p = 3.1 \times 10^{-16}$ ) (C)  | Ehret G. B. et al., 2016              |
|                                                 | SBP                                              | $\beta = -0.60$ ( $p = 3.28 \times 10^{-12}$ ) (C) |                                       |
|                                                 | DBP                                              | $\beta = -0.29$ ( $p = 1.0 \times 10^{-18}$ ) (C)  | Hoffmann T. J. et al., 2017           |

|                                                               |                                               |                                                    |                                       |
|---------------------------------------------------------------|-----------------------------------------------|----------------------------------------------------|---------------------------------------|
|                                                               | SBP                                           | $\beta = -0.36$ ( $p = 4.0 \times 10^{-11}$ ) (C)  | Liu C. et al., 2016                   |
|                                                               | DBP                                           | $\beta = 0.52$ ( $p = 9.2 \times 10^{-18}$ ) (G)   |                                       |
|                                                               | MAP                                           | $\beta = 0.58$ ( $p = 1.0 \times 10^{-17}$ ) (G)   |                                       |
|                                                               | SBP                                           | $\beta = 0.70$ ( $p = 6.2 \times 10^{-13}$ ) (G)   |                                       |
|                                                               | Hypertension                                  | Z score = 0.039 ( $p = 3.7 \times 10^{-9}$ ) (G)   |                                       |
|                                                               | DBP (trans-ethnic data)                       | $\beta = -0.03$ ( $p = 1.26 \times 10^{-19}$ ) (C) | Surendran P. et al., 2016             |
|                                                               | DBP (European)                                | $\beta = -0.03$ ( $p = 9.82 \times 10^{-10}$ ) (C) |                                       |
|                                                               | DBP                                           | $\beta = 0.47$ ( $p = 8.87 \times 10^{-14}$ ) (G)  | Wain L. V. et al., 2017               |
|                                                               | SBP                                           | $\beta = 0.63$ ( $p = 7.63 \times 10^{-10}$ ) (G)  |                                       |
|                                                               | DBP (smoking interaction) (European)          | $p = 1.51 \times 10^{-31}$                         | Sung Y. J. et al., 2018               |
|                                                               | SBP (smoking interaction) (European)          | $p = 8.46 \times 10^{-17}$                         |                                       |
|                                                               | DBP (smoking interaction) (trans-ethnic data) | $p = 3.77 \times 10^{-33}$                         |                                       |
|                                                               | SBP (smoking interaction) (trans-ethnic data) | $p = 7.43 \times 10^{-19}$                         |                                       |
| rs805303<br><i>BAG6/</i><br><i>BAT2-BAT5</i><br>(6: 31648589) | SBP                                           | $\beta = 0.37$ ( $p = 1.5 \times 10^{-11}$ ) (G)   | International Consortium et al., 2011 |
|                                                               | DBP                                           | $\beta = 0.23$ ( $p = 3.0 \times 10^{-11}$ ) (G)   |                                       |
|                                                               | Hypertension                                  | $\beta = 0.05$ ( $p = 1.1 \times 10^{-10}$ ) (G)   |                                       |
|                                                               | SBP (European)                                | $\beta = -0.02$ ( $p = 3.02 \times 10^{-6}$ ) (A)  | Surendran P. et al., 2016             |
| rs932764<br><i>PLCE1</i><br>(10: 94136183)                    | SBP                                           | $\beta = 0.48$ ( $p = 7.1 \times 10^{-16}$ ) (G)   | International Consortium et al., 2011 |
|                                                               | Hypertension                                  | $\beta = 0.06$ ( $p = 9.4 \times 10^{-9}$ ) (G)    |                                       |
|                                                               | SBP                                           | $\beta = -0.50$ ( $p = 6.88 \times 10^{-17}$ ) (A) | Ehret G. B., et al., 2016             |
|                                                               | DBP                                           | $\beta = -0.22$ ( $p = 6.28 \times 10^{-10}$ ) (A) |                                       |
|                                                               | SBP                                           | $\beta = -0.30$ ( $p = 1.0 \times 10^{-14}$ ) (A)  | Hoffmann T. J. et al., 2016           |
|                                                               | PP                                            | $\beta = -0.16$ ( $p = 3.0 \times 10^{-10}$ ) (A)  |                                       |
|                                                               | PP                                            | $\beta = 0.26$ ( $p = 5.67 \times 10^{-8}$ ) (G)   | Wain L. V., et al., 2017              |
| rs4387287<br><i>OBFC1</i><br>(10:103918139)                   | DBP (European)                                | $\beta = 0.22$ ( $p = 5.55 \times 10^{-8}$ ) (A)   | Surendran P. et al., 2016             |
|                                                               | SBP (European)                                | $\beta = 0.34$ ( $p = 2.21 \times 10^{-7}$ ) (A)   |                                       |
|                                                               | DBP (trans-ethnic data)                       | $\beta = 0.22$ ( $p = 4.21 \times 10^{-10}$ ) (A)  |                                       |
|                                                               | SBP (trans-ethnic data)                       | $\beta = 0.36$ ( $p = 9.12 \times 10^{-10}$ ) (A)  |                                       |
|                                                               | Hypertension (trans-ethnic data)              | Z score = 5.58 ( $p = 2.37 \times 10^{-8}$ ) (A)   |                                       |
| rs633185<br><i>ARHGAP42</i>                                   | SBP                                           | $\beta = -0.57$ ( $p = 1.2 \times 10^{-17}$ ) (G)  | International Consortium et al., 2011 |
|                                                               | DBP                                           | $\beta = -0.33$ ( $p = 2.0 \times 10^{-15}$ ) (G)  |                                       |

|                                                |                                                               |                                                   |                             |
|------------------------------------------------|---------------------------------------------------------------|---------------------------------------------------|-----------------------------|
| (11:100722807)                                 | Hypertension                                                  | $\beta = -0.07 (p = 6.4 \times 10^{-11})$ (G)     | Ehret G. B., et al., 2016   |
|                                                | SBP                                                           | $\beta = 0.52 (p = 6.97 \times 10^{-15})$ (C)     |                             |
|                                                | DBP                                                           | $\beta = 0.29 (p = 2.38 \times 10^{-12})$ (C)     |                             |
|                                                | SBP                                                           | $\beta = -0.49 (p = 1.0 \times 10^{-31})$ (G)     | Hoffmann T. J. et al., 2016 |
|                                                | DBP                                                           | $\beta = -0.27 (p = 1.0 \times 10^{-26})$ (G)     |                             |
|                                                | PP                                                            | $\beta = -0.22 (p = 1.0 \times 10^{-15})$ (G)     |                             |
|                                                | SBP                                                           | $\beta = 0.52 (p = 8.43 \times 10^{-11})$ (C)     | Wain L. V., et al., 2017    |
|                                                | DBP                                                           | $\beta = 0.27 (p = 2.33 \times 10^{-8})$ (C)      |                             |
|                                                | SBP x alcohol consumption interaction                         | $\beta = 0.54 (p = 2.24 \times 10^{-29})$ (C)     | Feitosa M. F. et al., 2018  |
|                                                | MAP x alcohol consumption interaction                         | $\beta = 0.22 (p = 2 \times 10^{-12})$ (C)        |                             |
|                                                | MAP                                                           | $\beta = 0.39 (p = 2.56 \times 10^{-13})$ (C)     | Takeuchi F., et al., 2018   |
|                                                | SBP                                                           | $\beta = 0.51 (p = 7.16 \times 10^{-12})$ (C)     |                             |
|                                                | DBP                                                           | $\beta = 0.33 (p = 8.93 \times 10^{-12})$ (C)     |                             |
|                                                | Hypertension                                                  | $\beta = 0.08 (p = 5.13 \times 10^{-10})$ (C)     |                             |
|                                                | Coronary artery disease                                       | $(p = 8.81 \times 10^{-9})$ (C)                   | Zhou W., et al., 2018       |
|                                                | High blood pressure and chronic obstructive pulmonary disease | $(p = 1.18 \times 10^{-47})$                      | Zhu Z., et al., 2019        |
|                                                | SBP (smoking interaction) (European)                          | $p = 8.44 \times 10^{-30}$                        | Sung Y. J., et al., 2018    |
|                                                | DBP (smoking interaction) (European)                          | $p = 2.68 \times 10^{-30}$                        |                             |
|                                                | SBP (smoking interaction) (trans-ethnic data)                 | $p = 1.80 \times 10^{-40}$                        |                             |
|                                                | DBP (smoking interaction) (trans-ethnic data)                 | $p = 1.18 \times 10^{-40}$                        |                             |
|                                                | MAP                                                           | $\beta = 0.03 (p = 3.05 \times 10^{-50})$ (C)     | Sakaue S. et al., 2021      |
| rs7302981<br>CERS5/AC074032.1<br>(12:50144032) | Hypertension                                                  | Z score = 6.23 ( $p = 4.8 \times 10^{-10}$ ) (A)  | Liu C. et al., 2016         |
|                                                | SBP                                                           | $\beta = 0.37 (p = 9.4 \times 10^{-15})$ (A)      |                             |
|                                                | DBP                                                           | $\beta = 0.25 (p = 9.4 \times 10^{-19})$ (A)      |                             |
|                                                | DBP (European)                                                | $\beta = 0.25 (p = 1.38 \times 10^{-17})$ (A)     | Surendran P. et al., 2016   |
|                                                | SBP (European)                                                | $\beta = 0.34 (p = 6.06 \times 10^{-13})$ (A)     |                             |
|                                                | Hypertension (European)                                       | Z score = 6.07 ( $p = 1.28 \times 10^{-9}$ ) (A)  |                             |
|                                                | DBP (trans-ethnic data)                                       | $\beta = 0.25 (p = 2.60 \times 10^{-19})$ (A)     |                             |
|                                                | SBP (trans-ethnic data)                                       | $\beta = 0.35 (p = 9.94 \times 10^{-19})$ (A)     |                             |
|                                                | Hypertension (trans-ethnic data)                              | Z score = 6.17 ( $p = 6.82 \times 10^{-10}$ ) (A) |                             |
| rs2681472<br>ATP2B1                            | DBP                                                           | $\beta = 0.50 (p = 1.47 \times 10^{-9})$ (A)      | Levy D. et al., 2009        |
|                                                | Hypertension                                                  | $\beta = 0.15 (p = 1.75 \times 10^{-11})$ (A)     |                             |

|                                                               |                                             |                                                     |                              |
|---------------------------------------------------------------|---------------------------------------------|-----------------------------------------------------|------------------------------|
| (12: 89615182)                                                | Coronary artery disease                     | OR = 1.08 ( $p = 6.17 \times 10^{-11}$ ) (G)        | Nikpay M., et al., 2015      |
|                                                               | Myocardial infarction                       | OR = 1.08 ( $p = 6.03 \times 10^{-9}$ ) (G)         |                              |
|                                                               | MAP                                         | $\beta = -0.59$ ( $p = 1.1 \times 10^{-21}$ ) (G)   | Liu C. et al., 2016          |
|                                                               | SBP                                         | $\beta = -0.85$ ( $p = 1.3 \times 10^{-21}$ ) (G)   |                              |
|                                                               | DBP                                         | $\beta = -0.47$ ( $p = 3.7 \times 10^{-17}$ ) (G)   |                              |
|                                                               | Hypertension                                | $\beta = -0.033$ ( $p = 3.5 \times 10^{-8}$ ) (G)   |                              |
|                                                               | Coronary artery disease                     | OR = 1.07 ( $p = 1 \times 10^{-21}$ ) (G)           | Nelson C. P., et al., 2017   |
|                                                               | SBP                                         | $\beta = 0.72$ ( $p = 1.06 \times 10^{-20}$ ) (A)   | Takeuchi F., et al., 2018    |
|                                                               | DBP                                         | $\beta = 0.33$ ( $p = 3.77 \times 10^{-11}$ ) (A)   |                              |
|                                                               | MAP                                         | $\beta = 0.46$ ( $p = 5.05 \times 10^{-17}$ ) (A)   |                              |
|                                                               | PP                                          | $\beta = 0.40$ ( $p = 5.49 \times 10^{-14}$ ) (A)   |                              |
|                                                               | Hypertension                                | $\beta = 0.07$ ( $p = 1.41 \times 10^{-6}$ ) (A)    |                              |
|                                                               | Coronary artery disease (trans-ethnic data) | $\beta = 0.060$ ( $p = 6.8 \times 10^{-25}$ ) (G)   | Koyama S., et al., 2020      |
|                                                               | Coronary artery disease (Japanese)          | $\beta = 0.068$ ( $p = 2.6 \times 10^{-11}$ ) (G)   | Hartiala J. A., et al., 2020 |
|                                                               | Myocardial infarction                       | OR = 1.07 ( $p = 1.3 \times 10^{-12}$ ) (G)         |                              |
| rs8068318<br><i>TBX2/</i><br><i>TBX2-AS1</i><br>(17:61406405) | Myocardial infarction                       | $\beta = 0.071$ ( $p = 1.17 \times 10^{-11}$ ) (G)  | Sakaue S. et al., 2021       |
|                                                               | MAP                                         | $\beta = -0.28$ ( $p = 2.0 \times 10^{-8}$ ) (C)    | Liu C. et al., 2016          |
|                                                               | SBP                                         | $\beta = -0.42$ ( $p = 3.9 \times 10^{-17}$ ) (C)   |                              |
|                                                               | Hypertension                                | Z score = $-6.96$ ( $p = 3.0 \times 10^{-12}$ ) (C) |                              |
|                                                               | DBP                                         | $\beta = -0.26$ ( $p = 3.0 \times 10^{-18}$ ) (C)   |                              |
|                                                               | SBP (European)                              | $\beta = 0.42$ ( $p = 1.3 \times 10^{-15}$ ) (T)    | Surendran P. et al., 2016    |
|                                                               | DBP (European)                              | $\beta = 0.26$ ( $p = 1.95 \times 10^{-16}$ ) (T)   |                              |
|                                                               | Hypertension (European)                     | Z score = $6.97$ ( $p = 3.21 \times 10^{-12}$ ) (T) |                              |
|                                                               | DBP (trans-ethnic data)                     | $\beta = 0.25$ ( $p = 2.75 \times 10^{-18}$ ) (T)   |                              |
|                                                               | SBP (trans-ethnic data)                     | $\beta = 0.41$ ( $p = 2.3 \times 10^{-17}$ ) (T)    |                              |
|                                                               | Hypertension (trans-ethnic data)            | Z score = $6.96$ ( $p = 3.43 \times 10^{-12}$ ) (T) |                              |
| rs167479<br><i>RGL3</i><br>(19:11416089)                      | SBP                                         | $\beta = 0.41$ ( $p = 1.6 \times 10^{-21}$ ) (G)    | Hoffmann T. J. et al., 2017  |
|                                                               | DBP                                         | $\beta = 0.25$ ( $p = 4.3 \times 10^{-22}$ ) (G)    |                              |
|                                                               | PP                                          | $\beta = 0.18$ ( $p = 3.2 \times 10^{-8}$ ) (G)     |                              |
|                                                               | MAP                                         | $\beta = -0.30$ ( $p = 7.3 \times 10^{-11}$ ) (T)   | Liu C. et al., 2016          |
|                                                               | Hypertension                                | Z score = $-7.72$ ( $p = 1.2 \times 10^{-14}$ ) (T) |                              |
|                                                               | SBP                                         | $\beta = -0.45$ ( $p = 1.0 \times 10^{-23}$ ) (T)   |                              |
|                                                               | DBP                                         | $\beta = -0.30$ ( $p = 4.2 \times 10^{-28}$ ) (T)   |                              |
|                                                               | DBP (European)                              | $\beta = -0.33$ ( $p = 1.99 \times 10^{-31}$ ) (T)  | Surendran P. et al., 2016    |
|                                                               | SBP (European)                              | $\beta = -0.50$ ( $p = 1.49 \times 10^{-26}$ ) (T)  |                              |

|  |                                  |                                                      |                        |
|--|----------------------------------|------------------------------------------------------|------------------------|
|  | Hypertension (European)          | Z score = $-7.86$ ( $p = 4.01 \times 10^{-15}$ ) (T) |                        |
|  | DBP (trans-ethnic data)          | $\beta = -0.31$ ( $p = 2.76 \times 10^{-32}$ ) (T)   |                        |
|  | SBP (trans-ethnic data)          | $\beta = -0.47$ ( $p = 8.64 \times 10^{-27}$ ) (T)   |                        |
|  | Hypertension (trans-ethnic data) | Z score = $-7.88$ ( $p = 3.37 \times 10^{-15}$ ) (T) |                        |
|  | SBP                              | $\beta = -0.41$ ( $p = 4.32 \times 10^{-36}$ ) (T)   | Giri A. et al. 2018    |
|  | Hypertension                     | $\beta = 0.05$ ( $p = 8.0 \times 10^{-16}$ ) (G)     | German C. A., 2019     |
|  | Hypertension                     | OR = $0.84 - 0.92$ ( $p = 2.37 \times 10^{-8}$ ) (T) | Jeong H. et al., 2020  |
|  | SBP                              | $\beta = -0.027$ ( $p = 3.24 \times 10^{-46}$ ) (T)  |                        |
|  | DBP                              | $\beta = -0.026$ ( $p = 2.24 \times 10^{-48}$ ) (T)  |                        |
|  | PP                               | $\beta = -0.016$ ( $p = 7.72 \times 10^{-18}$ ) (T)  |                        |
|  | MAP                              | $\beta = -0.028$ ( $p = 3.64 \times 10^{-48}$ ) (T)  | Sakaue S. et al., 2021 |

Notes: SBP - systolic blood pressure; DBP - diastolic blood pressure; MAP - mean arterial pressure; PP - pulse blood pressure; z-score - standard scores,  $\beta$  – effect, OR – odds ratio, p – significance level.

## References

1. Ehret GB, Ferreira T, Chasman DI, et al. The genetics of blood pressure regulation and its target organs from association studies in 342,415 individuals. *Nat Genet.* 2016;48(10):1171-1184. doi:10.1038/ng.3667
2. Feitosa MF, Kraja AT, Chasman DI, et al. Novel genetic associations for blood pressure identified via gene-alcohol interaction in up to 570K individuals across multiple ancestries. *PLoS One.* 2018;13(6):e0198166. doi:10.1371/journal.pone.0198166
3. German CA, Sinsheimer JS, Klimentidis YC, Zhou H, Zhou JJ. Ordered multinomial regression for genetic association analysis of ordinal phenotypes at Biobank scale. *Genet Epidemiol.* 2020;44(3):248-260. doi:10.1002/gepi.22276
4. Giri A, Hellwege JN, Keaton JM, et al. Trans-ethnic association study of blood pressure determinants in over 750,000 individuals. *Nat Genet.* 2019;51(1):51-62. doi:10.1038/s41588-018-0303-9
5. Hartiala JA, Han Y, Jia Q, et al. Genome-wide analysis identifies novel susceptibility loci for myocardial infarction. *Eur Heart J.* 2021;42(9):919-933. doi:10.1093/eurheartj/ehaa1040
6. Hoffmann TJ, Ehret GB, Nandakumar P, et al. Genome-wide association analyses using electronic health records identify new loci influencing blood pressure variation. *Nat Genet.* 2017;49(1):54-64. doi:10.1038/ng.3715
7. International Consortium for Blood Pressure Genome-Wide Association Studies, Ehret GB, Munroe PB, et al. Genetic variants in novel pathways influence blood pressure and cardiovascular disease risk. *Nature.* 2011;478(7367):103-109. doi:10.1038/nature10405
8. Jeong H, Jin HS, Kim SS, Shin D. Identifying Interactions between Dietary Sodium, Potassium, Sodium-Potassium Ratios, and FGF5 rs16998073 Variants and Their Associated Risk for Hypertension in Korean Adults. *Nutrients.* 2020;12(7):2121. doi:10.3390/nu12072121
9. Kato N, Loh M, Takeuchi F, et al. Trans-ancestry genome-wide association study identifies 12 genetic loci influencing blood pressure and implicates a role for DNA methylation. *Nat Genet.* 2015;47(11):1282-1293. doi:10.1038/ng.3405
10. Koyama S, Ito K, Terao C, et al. Population-specific and trans-ancestry genome-wide analyses identify distinct and shared genetic risk loci for coronary artery disease. *Nat Genet.* 2020;52(11):1169-1177. doi:10.1038/s41588-020-0705-3
11. Levy D, Ehret GB, Rice K, et al. Genome-wide association study of blood pressure and hypertension. *Nat Genet.* 2009;41(6):677-687. doi:10.1038/ng.384

12. Liu C, Kraja AT, Smith JA, et al. Meta-analysis identifies common and rare variants influencing blood pressure and overlapping with metabolic trait loci. *Nat Genet.* 2016;48(10):1162-1170. doi:10.1038/ng.3660
13. Nelson CP, Goel A, Butterworth AS, et al. Association analyses based on false discovery rate implicate new loci for coronary artery disease. *Nat Genet.* 2017;49(9):1385-1391. doi:10.1038/ng.3913
14. Nikpay M, Goel A, Won HH, et al. A comprehensive 1,000 Genomes-based genome-wide association meta-analysis of coronary artery disease. *Nat Genet.* 2015;47(10):1121-1130. doi:10.1038/ng.3396
15. Sakaue S, Kanai M, Tanigawa Y, et al. A cross-population atlas of genetic associations for 220 human phenotypes. *Nat Genet.* 2021;53(10):1415-1424. doi:10.1038/s41588-021-00931-x
16. Shungin D, Winkler TW, Croteau-Chonka DC, et al. New genetic loci link adipose and insulin biology to body fat distribution. *Nature.* 2015;518(7538):187-196. doi:10.1038/nature14132
17. Sung YJ, Winkler TW, de Las Fuentes L, et al. A Large-Scale Multi-ancestry Genome-wide Study Accounting for Smoking Behavior Identifies Multiple Significant Loci for Blood Pressure. *Am J Hum Genet.* 2018;102(3):375-400. doi:10.1016/j.ajhg.2018.01.015
18. Surendran P, Drenos F, Young R, et al. Trans-ancestry meta-analyses identify rare and common variants associated with blood pressure and hypertension. *Nat Genet.* 2016;48(10):1151-1161. doi:10.1038/ng.3654
19. Tachmazidou I, Süveges D, Min JL, et al. Whole-Genome Sequencing Coupled to Imputation Discovers Genetic Signals for Anthropometric Traits. *Am J Hum Genet.* 2017;100(6):865-884. doi:10.1016/j.ajhg.2017.04.014
20. Takeuchi F, Akiyama M, Matoba N, et al. Interethnic analyses of blood pressure loci in populations of East Asian and European descent. *Nat Commun.* 2018;9(1):5052. doi:10.1038/s41467-018-07345-0
21. Wain LV, Vaez A, Jansen R, et al. Novel Blood Pressure Locus and Gene Discovery Using Genome-Wide Association Study and Expression Data Sets From Blood and the Kidney. *Hypertension.* 2017; HYPERTENSIONAHA.117.09438. doi:10.1161/HYPERTENSIONAHA.117.09438
22. Wain LV, Verwoert GC, O'Reilly PF, et al. Genome-wide association study identifies six new loci influencing pulse pressure and mean arterial pressure. *Nat Genet.* 2011;43(10):1005-1011. doi:10.1038/ng.922
23. Zhou W, Nielsen JB, Fritsche LG, et al. Efficiently controlling for case-control imbalance and sample relatedness in large-scale genetic association studies. *Nat Genet.* 2018;50(9):1335-1341. doi:10.1038/s41588-018-0184-y

24. Zhu Z, Wang X, Li X, et al. Genetic overlap of chronic obstructive pulmonary disease and cardiovascular disease-related traits: a large-scale genome-wide cross-trait analysis. *Respir Res.* 2019;20(1):64. doi:10.1186/s12931-019-1036-8
