# Supplementary material for: Effects of Pre-Pregnancy Overweight/Obesity on the Pattern of Association of Hypertension Susceptibility Genes with Preeclampsia
Source: MDPI journal article supplement (doi:10.3390/life12122018), 2022-12-03
Supplement: s1 [file s1]

Supplementary table S4

The allele and genotype frequencies of the studied SNPs in the preeclampsia and control groups with preBMI $\geq$ 25

| Chr                           | SNP       | Gene              | Minor allele | Major allele | Minor allele frequency | Number of the studied chromosomes | Genotype distribution* | H <sub>o</sub> | H <sub>e</sub> | P <sub>HWE</sub> |
|-------------------------------|-----------|-------------------|--------------|--------------|------------------------|-----------------------------------|------------------------|----------------|----------------|------------------|
| Preeclampsia patients (n=162) |           |                   |              |              |                        |                                   |                        |                |                |                  |
| 5                             | rs1173771 | <i>AC026703.1</i> | A            | G            | 0.437                  | 316                               | 29/80/49               | 0.506          | 0.492          | 0.749            |
| 6                             | rs1799945 | <i>HFE</i>        | G            | C            | 0.205                  | 322                               | 11/44/106              | 0.273          | 0.326          | 0.050            |
| 6                             | rs805303  | <i>BAG6</i>       | A            | G            | 0.294                  | 320                               | 12/70/78               | 0.437          | 0.415          | 0.571            |
| 10                            | rs932764  | <i>PLCE1</i>      | A            | G            | 0.462                  | 320                               | 32/84/44               | 0.525          | 0.497          | 0.528            |
| 10                            | rs4387287 | <i>OBFC1</i>      | A            | C            | 0.163                  | 306                               | 5/40/108               | 0.261          | 0.273          | 0.556            |
| 11                            | rs633185  | <i>ARHGAP42</i>   | G            | C            | 0.256                  | 316                               | 10/61/87               | 0.386          | 0.381          | 1.000            |
| 12                            | rs7302981 | <i>CERS5</i>      | A            | G            | 0.332                  | 316                               | 14/77/67               | 0.487          | 0.444          | 0.282            |
| 12                            | rs2681472 | <i>ATP2B1</i>     | G            | A            | 0.152                  | 322                               | 6/37/118               | 0.230          | 0.258          | 0.213            |
| 17                            | rs8068318 | <i>TBX2</i>       | C            | T            | 0.258                  | 314                               | 12/57/88               | 0.363          | 0.383          | 0.533            |
| 19                            | rs167479  | <i>RGL3</i>       | G            | T            | 0.522                  | 318                               | 38/90/31               | 0.566          | 0.499          | 0.113            |
| Control group (n=159)         |           |                   |              |              |                        |                                   |                        |                |                |                  |
| 5                             | rs1173771 | <i>AC026703.1</i> | A            | G            | 0.443                  | 314                               | 28/83/46               | 0.529          | 0.493          | 0.421            |
| 6                             | rs1799945 | <i>HFE</i>        | G            | C            | 0.183                  | 316                               | 4/50/104               | 0.316          | 0.300          | 0.603            |
| 6                             | rs805303  | <i>BAG6</i>       | A            | G            | 0.386                  | 316                               | 29/64/65               | 0.405          | 0.474          | 0.067            |
| 10                            | rs932764  | <i>PLCE1</i>      | A            | G            | 0.459                  | 316                               | 37/71/50               | 0.449          | 0.497          | 0.262            |
| 10                            | rs4387287 | <i>OBFC1</i>      | A            | C            | 0.180                  | 306                               | 3/49/101               | 0.320          | 0.295          | 0.413            |
| 11                            | rs633185  | <i>ARHGAP42</i>   | G            | C            | 0.280                  | 318                               | 12/65/82               | 0.409          | 0.403          | 1.000            |
| 12                            | rs7302981 | <i>CERS5</i>      | A            | G            | 0.383                  | 316                               | 22/77/59               | 0.487          | 0.473          | 0.739            |
| 12                            | rs2681472 | <i>ATP2B1</i>     | G            | A            | 0.154                  | 312                               | 5/38/113               | 0.244          | 0.260          | 0.367            |
| 17                            | rs8068318 | <i>TBX2</i>       | C            | T            | 0.287                  | 314                               | 14/62/81               | 0.395          | 0.409          | 0.697            |
| 19                            | rs167479  | <i>RGL3</i>       | G            | T            | 0.449                  | 316                               | 33/76/49               | 0.481          | 0.495          | 0.748            |

Note: \* minor allele homozygotes / heterozygotes / major allele homozygotes
